# Supplementary material for: Recent advances in synthesis of water-stable metal halide perovskites and photocatalytic applications
Source: Royal Society of Chemistry journal article supplement (doi:10.1039/d3ta04994a), 2023-01-01
Supplement: d3ta04994a1.pdf [file d3ta04994a1.pdf]

## Supporting information

### **Recent advances in synthesis of water-stable metal halide perovskites and photocatalytic applications**

He Zhao,<sup>a</sup> Krisztian Kordas<sup>\*b</sup> and Satu Ojala<sup>\*a</sup>

<sup>a</sup> Environmental and Chemical Engineering Research Unit, Faculty of Technology, University of Oulu, P. O. Box 4300, FI-90014 Oulu, Finland

<sup>b</sup> Microelectronics Research Unit, Faculty of Information Technology and Electrical Engineering, University of Oulu, P. O. Box 4500, FI-90014 Oulu, Finland

#### **Corresponding Authors**

\*E-mail: [satu.ojala@oulu.fi](mailto:satu.ojala@oulu.fi)

\*E-mail: [krisztian.kordas@oulu.fi](mailto:krisztian.kordas@oulu.fi)

**Table S1.** Summary of water-stable MHPs for different applications.

| Water-stable MHP                                                                                 | Strategy                   | Applications | Ref. |
|--------------------------------------------------------------------------------------------------|----------------------------|--------------|------|
| POSS–CsPbBr <sub>3</sub> NCs                                                                     | Ligand engineering         | LED          | 1    |
| Paraffin–CsPbX <sub>3</sub> QDs                                                                  | Ligand engineering         | LED          | 2    |
| Paraffin–CsPb <sub>0.7</sub> Sn <sub>0.3</sub> Br <sub>2</sub> I QDs                             | Ligand engineering         | LED          | 3    |
| CsPbBr <sub>3</sub> NCs                                                                          | Water-assisted engineering | LED          | 4    |
| CsPbBr <sub>3</sub> –AlSt <sub>3</sub> NCs                                                       | Ligand engineering         | LED          | 5    |
| CsPbBr <sub>3</sub> –AlSt <sub>3</sub> QDs                                                       | Ligand engineering         | LED          | 6    |
| Norland Optical Adhesives<br>61/CH <sub>3</sub> NH <sub>3</sub> PbBr <sub>3</sub> film           | Organic polymer            | LED          | 7    |
| CsPbBr <sub>0.6</sub> I <sub>2.4</sub> QD/Ergos optical<br>adhesive 8500 films                   | Organic polymer            | LED          | 8    |
| MAPbBr <sub>3</sub> /phenyl methyl silicon<br>resin (1.13 wt%) NCs                               | Organic polymer            | LED          | 9    |
| MAPbBr <sub>3</sub> –polystyrene film                                                            | Organic polymer            | LED          | 10   |
| benzyl-<br>dimethyloctadecylammonium<br>chloride (V18)-MAPbBr <sub>3</sub> NCs                   | Organic polymer            | LED          | 11   |
| CsPbBr <sub>3</sub> –poly(methyl methacrylate)                                                   | Organic polymer            | LED          | 12   |
| MAPbBr <sub>3</sub> (8 wt.%)<br>NCs/polyvinylidene fluoride film                                 | Organic polymer            | LED          | 13   |
| Hydrolyzed poly(methyl<br>methacrylate)-coated CH <sub>3</sub> NH <sub>3</sub> PbBr <sub>3</sub> | Organic polymer            | LED          | 14   |
| Silicone resin/polyvinylpyrrolidone–<br>CsPbBr <sub>3</sub> nanofibrous membranes                | Organic polymer            | LED          | 15   |
| Polyimide-coated CsPbBr <sub>3</sub> NCs                                                         | Organic polymer            | LED          | 16   |
| superhydrophobic aerogel inorganic<br>matrix (S-AIM)/CsPbBr <sub>3</sub> QDs                     | Inorganic materials        | LED          | 17   |

|                                                                                                                                                                                                    |                                                  |     |    |
|----------------------------------------------------------------------------------------------------------------------------------------------------------------------------------------------------|--------------------------------------------------|-----|----|
| CsPbBr <sub>3</sub> QDs/mesoporous silica aerogels                                                                                                                                                 | Inorganic materials                              | LED | 18 |
| Mesoporous SiO <sub>2</sub> -CsPbBr <sub>3</sub> @AlO <sub>x</sub>                                                                                                                                 | Inorganic materials                              | LED | 19 |
| MAPbBr <sub>3</sub> @SiO <sub>2</sub> /poly(vinylidene fluoride) nanoparticles                                                                                                                     | Organic polymer and inorganic materials          | LED | 20 |
| CsPbI <sub>3</sub> @polystyrene@SiO <sub>2</sub>                                                                                                                                                   | Organic polymer and inorganic materials          | LED | 21 |
| CsPbBr <sub>3</sub> /SiO <sub>2</sub>                                                                                                                                                              | Inorganic materials                              | LED | 22 |
| CsPbBr <sub>3</sub> /ZrO <sub>2</sub> -10                                                                                                                                                          | Inorganic materials                              | LED | 23 |
| Mn-doped CsPbCl <sub>3</sub> -SiO <sub>2</sub> /Al <sub>2</sub> O <sub>3</sub> monolith                                                                                                            | Inorganic materials                              | LED | 24 |
| CsPbBr <sub>3</sub> QDs@SiO <sub>2</sub>                                                                                                                                                           | Inorganic materials                              | LED | 25 |
| CsPbBr <sub>1.2</sub> /I <sub>1.8</sub> NCs@P-Si-Zn glass                                                                                                                                          | Inorganic materials                              | LED | 26 |
| Ni <sup>2+</sup> -doped CsPbBr <sub>3</sub> NCs@B-Si-Zn glass                                                                                                                                      | Inorganic materials                              | LED | 27 |
| CsPbBr <sub>3</sub> QDs@TeO <sub>2</sub> -based glass                                                                                                                                              | Inorganic materials                              | LED | 28 |
| (CsPbI <sub>3</sub> ) <sub>0.25</sub> (a <sub>g</sub> ZIF-62) <sub>0.75</sub>                                                                                                                      | Inorganic materials                              | LED | 29 |
| CsPbBr <sub>3</sub> /SiO <sub>2</sub>                                                                                                                                                              | Inorganic materials                              | LED | 30 |
| MAPbBr <sub>3</sub> @PbBr(OH)                                                                                                                                                                      | Water-assisted engineering                       | LED | 31 |
| MAPbBr <sub>3</sub> @PbBr(OH)                                                                                                                                                                      | Water-assisted engineering                       | LED | 32 |
| MAPbBr <sub>3</sub> @PbBr(OH)                                                                                                                                                                      | Water-assisted engineering                       | LED | 33 |
| CsPbBr <sub>3</sub> /CsPb <sub>2</sub> Br <sub>5</sub> @PbBr(OH)                                                                                                                                   | Water-assisted engineering and phase engineering | LED | 34 |
| CsPb <sub>2</sub> Br <sub>5</sub> -embedded Pb(OH)Br                                                                                                                                               | Water-assisted engineering and phase engineering | LED | 35 |
| Trifluoromethyl-modified PEA <sub>2</sub> PbBr <sub>4</sub>                                                                                                                                        | Intrinsic stability                              | LED | 36 |
| 4,4'-trimethylenedipyridinium lead bromide crystals [(4,4'-TMDP)Pb <sub>2</sub> Br <sub>6</sub> ] and 4,4'-ethylenedipyridinium lead bromide crystals [(4,4'-EDP)Pb <sub>2</sub> Br <sub>6</sub> ] | Intrinsic stability                              | LED | 37 |

|                                                                                                                                          |                            |                 |    |
|------------------------------------------------------------------------------------------------------------------------------------------|----------------------------|-----------------|----|
| Solid lipid nanoparticles-<br>CsPb(Br <sub>0.2</sub> I <sub>0.8</sub> ) <sub>3</sub>                                                     | Ligand engineering         | Water stability | 38 |
| CsPbBr <sub>3</sub> NCs-PMA                                                                                                              | Organic polymer            | Water stability | 39 |
| MAPbX <sub>3</sub> NCs- polystyrene-poly(2-<br>vinylpyridine) (PS-b-P2VP)                                                                | Organic polymer            | Water stability | 40 |
| CsPbBr <sub>3</sub> QDs-poly(styrene-ethylene-<br>butylene-styrene) films                                                                | Organic polymer            | Water stability | 41 |
| CsPbX <sub>3</sub> QDs/AlO <sub>x</sub> films                                                                                            | Inorganic materials        | Water stability | 42 |
| Cs <sub>2</sub> Sn <sub>0.89</sub> Te <sub>0.11</sub> Cl <sub>6</sub>                                                                    | Inorganic materials        | Water stability | 43 |
| CsPbBr <sub>3</sub> @SiO <sub>2</sub> NPs                                                                                                | Inorganic materials        | Water stability | 44 |
| PEGylated CsPbBr <sub>3</sub> /SiO <sub>2</sub> QDs                                                                                      | Inorganic materials        | Water stability | 45 |
| CsPbBr <sub>3</sub> @NaYF <sub>4</sub> and CsPbBr <sub>3</sub> @ZnO<br>nanoparticles                                                     | Inorganic materials        | Water stability | 46 |
| CsPbBr <sub>3</sub> /CsPb <sub>2</sub> Br <sub>5</sub>                                                                                   | Phase engineering          | Water stability | 47 |
| Sb <sup>3+</sup> -doped dual-phase<br>CsPb <sub>2</sub> Br <sub>5</sub> /CsPbBr <sub>3</sub> NCs                                         | Phase engineering          | Water stability | 48 |
| CsPbX <sub>3</sub> NCs                                                                                                                   | Water-assisted engineering | Water stability | 49 |
| quasi-2D CsPbBr <sub>3</sub> NSs                                                                                                         | Water-assisted engineering | Water stability | 50 |
| Pb(OH) <sub>2</sub> -coated MAPbX <sub>3</sub>                                                                                           | Water-assisted engineering | Water stability | 51 |
| CsPbBr <sub>3</sub> /PbBrF                                                                                                               | Water-assisted engineering | Water stability | 52 |
| [Pb <sub>2</sub> X <sub>2</sub> <sup>2+</sup> ] [O <sub>2</sub> C(CH <sub>2</sub> ) <sub>4</sub> CO <sub>2</sub> <sup>-</sup> ] crystals | Intrinsic stability        | Water stability | 53 |
| (C <sub>4</sub> H <sub>9</sub> ) <sub>4</sub> NCuCl <sub>2</sub> single crystals                                                         | Intrinsic stability        | Water stability | 54 |
| Mn-doped 2D (PEA) <sub>2</sub> PbBr <sub>4</sub> crystals                                                                                | Intrinsic stability        | Water stability | 55 |
| (HCya) <sub>2</sub> PbI <sub>4</sub> (Cya = HS(CH <sub>2</sub> ) <sub>2</sub> NH <sub>2</sub> )<br>crystals                              | Intrinsic stability        | Water stability | 56 |
| [N-methylidabconium]PbI <sub>3</sub> crystals                                                                                            | Intrinsic stability        | Water stability | 57 |
| (DAO)Sn <sub>2</sub> I <sub>6</sub> (DAO = 1,8-<br>octyldiammonium) crystals                                                             | Intrinsic stability        | Water stability | 58 |

|                                                                                                                                                                                                           |                            |                 |    |
|-----------------------------------------------------------------------------------------------------------------------------------------------------------------------------------------------------------|----------------------------|-----------------|----|
| $\text{Rb}_{0.05}\text{Cs}_{2.95}\text{Bi}_2\text{I}_9$                                                                                                                                                   | Intrinsic stability        | Water stability | 59 |
| Hexafluorobutyl methacrylate-coated<br>$\text{Co}_{2\%}\text{@CsPbBr}_3/\text{Cs}_4\text{PbBr}_6$ NCs                                                                                                     | Ligand engineering         | Photocatalysis  | 60 |
| $\text{MAPbBr}_3\text{@ZIF-8}$                                                                                                                                                                            | MOF                        | Photocatalysis  | 61 |
| $\text{CsPbI}_3\text{@PCN-222}$ (20%)                                                                                                                                                                     | MOF                        | Photocatalysis  | 62 |
| Pb-rich $\text{CsPbCl}_3$ nanocrystals                                                                                                                                                                    | Water-assisted engineering | Photocatalysis  | 63 |
| $[(\text{CH}_3)_2\text{NH}_3]_3[\text{BiI}_6]$                                                                                                                                                            | Common-ion effect          | Photocatalysis  | 64 |
| $\text{C}_6\text{H}_5\text{CH}_2\text{NH}_3\text{PbI}_4$ , $\text{C}_6\text{H}_5(\text{CH}_2)_2\text{NH}_3\text{PbI}_4$<br>and with $\text{C}_6\text{H}_5(\text{CH}_2)_3\text{NH}_3\text{Pb}_2\text{I}_7$ | Common-ion effect          | Photocatalysis  | 65 |
| $\text{OHNH}_3\text{PbI}_2\text{Cl}$                                                                                                                                                                      | Intrinsic stability        | Photocatalysis  | 66 |
| $\text{DMASnI}_3$                                                                                                                                                                                         | Intrinsic stability        | Photocatalysis  | 67 |
| $(\text{HDA})_2\text{PbI}_4$ [ $\text{HDA}^+=\text{CH}_3(\text{CH}_2)_{15}\text{NH}_3^+$ ]                                                                                                                | Intrinsic stability        | Photocatalysis  | 68 |
| $\text{DMASnI}_x\text{Br}_{3-x}$ crystals                                                                                                                                                                 | Intrinsic stability        | Photocatalysis  | 69 |
| $\{\text{C}_6\text{H}_5(\text{CH}_2)_2\text{NH}_3\}_2\text{SnBr}_4$ ( $\text{PEA}_2\text{SnBr}_4$ )                                                                                                       | Intrinsic stability        | Photocatalysis  | 70 |
| $[\text{Pb}_2\text{X}_2^{2+}]$ [ $\text{O}_2\text{C}(\text{CH}_2)_4\text{CO}_2^-$ ] crystals                                                                                                              | Intrinsic stability        | Photocatalysis  | 71 |
| $(3\text{-ethylbenzo[d]thiazol-3-ium})_4\text{Bi}_2\text{I}_{10}$<br>( $\text{EtbTbi}_2\text{I}_{10}$ ) single crystals                                                                                   | Intrinsic stability        | Photocatalysis  | 72 |
| $\text{C}_6\text{H}_4\text{NH}_2\text{CuCl}_2\text{I}$                                                                                                                                                    | Intrinsic stability        | Photocatalysis  | 73 |
| 33 wt % $\text{DMASnBr}_3\text{@g-C}_3\text{N}_4$                                                                                                                                                         | Intrinsic stability        | Photocatalysis  | 74 |
| $\text{CsPbBr}_3\text{@g-C}_3\text{N}_4$                                                                                                                                                                  | Intrinsic stability        | Photocatalysis  | 75 |
| $\text{DMASnBr}_3$                                                                                                                                                                                        | Intrinsic stability        | Photocatalysis  | 76 |
| $\text{Cs}_3\text{Bi}_2\text{Br}_9/\text{g-C}_3\text{N}_4$                                                                                                                                                | Intrinsic stability        | Photocatalysis  | 77 |
| $\text{Cs}_2\text{Pt}_x\text{Sn}_{1-x}\text{Cl}_6$                                                                                                                                                        | Intrinsic stability        | Photocatalysis  | 78 |
| $\text{Au}_{0.19}/[\text{Pb}_8\text{I}_8(\text{H}_2\text{O})_3]^{8+}[\text{O}_2\text{C}(\text{CH}_2)_4\text{CO}_2^-]$<br>4-                                                                               | Intrinsic stability        | Photocatalysis  | 79 |
| $\text{C}_6\text{F}_{13}\text{CH}_2\text{CH}_2\text{Si}(\text{OCH}_2\text{CH}_3)_3$ (PFOTHS)-<br>$\text{CsPbBr}_3/\text{Cs}_4\text{PbBr}_6/\text{BaSO}_4$                                                 | Ligand engineering         | Imaging         | 80 |

|                                                                                                                                                                                          |                                         |                                    |    |
|------------------------------------------------------------------------------------------------------------------------------------------------------------------------------------------|-----------------------------------------|------------------------------------|----|
| CsPbBr <sub>3</sub> QDs@polystyrene                                                                                                                                                      | Organic polymer                         | Imaging                            | 81 |
| Polyvinyl pyrrolidone-capped CsPbX <sub>3</sub> NCs@polystyrene microhemispheres                                                                                                         | Organic polymer                         | Imaging                            | 82 |
| Poly(ethylene-ran-butylene)-block-polystyrene (PS-PEB-PS) and poly(ethylene glycol)-block-poly(propylene glycol)-block-poly(ethylene glycol (PEG-PPG-PEG) coated CsPbBr <sub>3</sub> QDs | Organic polymer                         | Imaging                            | 83 |
| CsPbBr <sub>3</sub> /SiO <sub>2</sub> /poly(ethylene glycol) grafted phospholipid                                                                                                        | Inorganic materials and organic polymer | Imaging                            | 84 |
| phTEOS-TMOS@CsPbBr <sub>3</sub> NCs                                                                                                                                                      | Inorganic materials                     | Imaging                            | 85 |
| Polyvinyl pyrrolidone-CsPbBr <sub>3</sub> QD@SiO <sub>2</sub> -octadecyl trimethoxysilanelecithin core-shell nanoparticles                                                               | Inorganic materials                     | Imaging                            | 86 |
| 1D Nanowire, 2D Nanoplatelet, and 3D Nanocube CsPbBr <sub>3</sub> NCs                                                                                                                    | Water-assisted engineering              | Imaging                            | 87 |
| Pb(OH) <sub>2</sub> -coated MAPbX <sub>3</sub>                                                                                                                                           | Water-assisted engineering              | Imaging                            | 88 |
| CsPbBr <sub>3</sub> @PCN-333(Fe)                                                                                                                                                         | MOF                                     | (Photo)electrochemical application | 89 |
| 4-[(N-3-butyl)carboxyamido]anilinium lead(II) iodide (NBCAnPbI <sub>3</sub> )/CH <sub>3</sub> NH <sub>3</sub> PbI <sub>3</sub>                                                           | Intrinsic stability                     | (Photo)electrochemical application | 90 |
| APbX <sub>2</sub> (A = Bipyridine) crystals                                                                                                                                              | Intrinsic stability                     | (Photo)electrochemical application | 91 |
| Cs <sub>2</sub> PtI <sub>6</sub>                                                                                                                                                         | Intrinsic stability                     | (Photo)electrochemical application | 92 |
| CsPbBr <sub>3</sub> /polypyrrole                                                                                                                                                         | Organic polymer                         | (Photo)electrochemical application | 93 |
| CsPbBr <sub>3</sub> /polyaniline                                                                                                                                                         | Organic polymer                         | (Photo)electrochemical application | 94 |
| CsPbBr <sub>3</sub> /TiO <sub>x</sub>                                                                                                                                                    | Inorganic materials                     | (Photo)electrochemical             | 95 |

|                                                                                 |                                                   | application                        |     |
|---------------------------------------------------------------------------------|---------------------------------------------------|------------------------------------|-----|
| CsPbBr <sub>3</sub>                                                             | Water-assisted engineering                        | (Photo)electrochemical application | 96  |
| Succinic acid-capped CsPbBr <sub>3</sub> QDs                                    | Ligand engineering                                | Sensor                             | 97  |
| CsPbBr <sub>3</sub> /Cs <sub>4</sub> PbBr <sub>6</sub> NCs-Hyflon-DFTHS/OLA     | Organic polymer                                   | Sensor                             | 98  |
| CsPbBr <sub>3</sub> /octylamine-modified polyacrylic acid + OAm NCs             | Organic polymer                                   | Sensor                             | 99  |
| CH <sub>3</sub> NH <sub>3</sub> PbBr <sub>3</sub> @MOF-5                        | MOF                                               | Sensor                             | 100 |
| CsPbX <sub>3</sub> /hierarchically porous ZIF-8                                 | MOF                                               | Sensor                             | 101 |
| MAPbBr <sub>3</sub> @PbBr(OH)@SiO <sub>2</sub> -citric acid -Eu                 | Water-assisted engineering and inorganic material | Sensor                             | 102 |
| [(AD)Pb <sub>2</sub> Cl <sub>5</sub> ] (AD = acridine) microbelts               | Intrinsic stability                               | Sensor                             | 103 |
| (C <sub>4</sub> H <sub>9</sub> ) <sub>4</sub> NPbI <sub>3</sub>                 | Intrinsic stability                               | Solar cell                         | 104 |
| Crosslinked PETA-G/FA <sub>0.92</sub> MA <sub>0.08</sub> PbI <sub>3</sub> films | Organic polymer                                   | Solar cells                        | 105 |
| C <sub>6</sub> H <sub>4</sub> NH <sub>2</sub> CuBr <sub>2</sub> I               | Intrinsic stability                               | Solar cell                         | 106 |
| C <sub>6</sub> H <sub>4</sub> NH <sub>2</sub> CuBr <sub>2</sub> I               | Intrinsic stability                               | Solar cell                         | 107 |
| CH <sub>3</sub> NH <sub>3</sub> Pb(SCN)2I                                       | Intrinsic stability                               | Solar cell                         | 108 |
| CsPbBr <sub>3</sub> QDs-HSZ ZSM-5                                               | Inorganic materials                               | Fingerprint detection              | 109 |
| MAPbBr <sub>3</sub> @PbBr(OH)                                                   | Water-assisted engineering                        | Fingerprint detection              | 31  |
| MAPbBr <sub>3</sub> @PbBr(OH)                                                   | Water-assisted engineering                        | Anticounterfeit                    | 32  |
| Al <sub>2</sub> O <sub>3</sub> coated CsPbBr <sub>3</sub> nanoplate             | ALD                                               | Laser                              | 110 |
| CsPbBr <sub>3</sub> QDs@SiO <sub>2</sub> -SH nanodots                           | Inorganic materials                               | Laser                              | 111 |

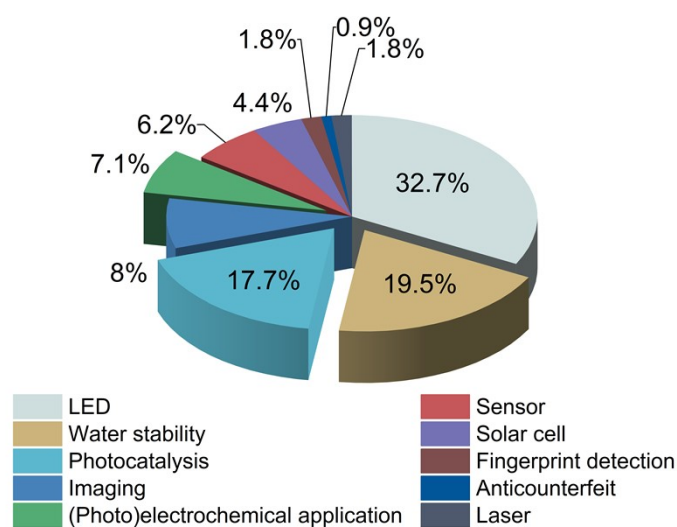

**Figure S1.** Pie chart showing the application distribution of water-stable MHPs.

## References

- 1 H. Huang, B. Chen, Z. Wang, T. F. Hung, A. S. Susha, H. Zhong and A. L. Rogach, *Chem. Sci.*, 2016, **7**, 5699–5703.
- 2 H. Wu, S. Lin, R. Wang, X. You and Y. Chi, *Nanoscale*, 2019, **11**, 5557–5563.
- 3 S. Liu, L. Yuan, Y. Zhao, Y. Chen, W. Xiang and X. Liang, *J. Alloys Compd.*, 2019, **806**, 1022–1028.
- 4 L. Yang, T. Wang, Q. Min, B. Liu, Z. Liu, X. Fan, J. Qiu, X. Xu, J. Yu and X. Yu, *ACS Omega*, 2019, **4**, 6084–6091.
- 5 Y. Chang, Y. J. Yoon, G. Li, E. Xu, S. Yu, C.-H. Lu, Z. Wang, Y. He, C. H. Lin, B. K. Wagner, V. V. Tsukruk, Z. Kang, N. Thadhani, Y. Jiang and Z. Lin, *ACS Appl. Mater. Interfaces*, 2018, **10**, 37267–37276.
- 6 B. Shu, Y. Chang, L. Dong, L. Chen, H. Wang, S. Yang, J. Zhang, X. Cheng and D. Yu, *J. Lumin.*, 2021, **234**, 117962.
- 7 Y.-H. Song, J. S. Yoo, E. K. Ji, C. W. Lee, G. S. Han, H. S. Jung and D.-H. Yoon, *Chem. Eng. J.*, 2016, **306**, 791–795.
- 8 J. Ren, X. Dong, G. Zhang, T. Li and Y. Wang, *New J. Chem.*, 2017, **41**, 13961–13967.
- 9 H. Wang, H. Lin, X. Piao, P. Tian, M. Fang, X. An, C. Luo, R. Qi, Y. Chen and H. Peng, *J. Mater. Chem. C*, 2017, **5**, 12044–12049.
- 10 Y. Wang, J. He, H. Chen, J. Chen, R. Zhu, P. Ma, A. Towers, Y. Lin, A. J. Gesquiere, S. Wu and Y. Dong, *Adv. Mater.*, 2016, **28**, 10710–10717.
- 11 H. Sun, Z. Yang, M. Wei, W. Sun, X. Li, S. Ye, Y. Zhao, H. Tan, E. L. Kynaston, T. B. Schon, H. Yan, Z.-H. Lu, G. A. Ozin, E. H. Sargent and D. S. Seferos, *Adv. Mater.*, 2017, **29**, 1701153.
- 12 Y. Xin, H. Zhao and J. Zhang, *ACS Appl. Mater. Interfaces*, 2018, **10**, 4971–4980.
- 13 Q. Zhou, Z. Bai, W. Lu, Y. Wang, B. Zou and H. Zhong, *Adv. Mater.*, 2016, **28**, 9163–9168.
- 14 G. Jiang, C. Guhrenz, A. Kirch, L. Sonntag, C. Bauer, X. Fan, J. Wang, S. Reineke, N. Gaponik and A. Eychmüller, *ACS Nano*,



- 2019, **13**, 10386–10396.
- 15 J. Hai, H. Li, Y. Zhao, F. Chen, Y. Peng and B. Wang, *Chem. Commun.*, 2017, **53**, 5400–5403.
- 16 J. Zhang, P. Jiang, Y. Wang, X. Liu, J. Ma and G. Tu, *ACS Appl. Mater. Interfaces*, 2020, **12**, 3080–3085.
- 17 Z. Li, C. Song, J. Li, G. Liang, L. Rao, S. Yu, X. Ding, Y. Tang, B. Yu, J. Ou, U. Lemmer and G. Gomard, *Adv. Mater. Technol.*, 2020, **5**, 1900941.
- 18 Y.-T. Hsieh, Y.-F. Lin and W.-R. Liu, *ACS Appl. Mater. Interfaces*, 2020, **12**, 58049–58059.
- 19 C.-Y. You, F.-M. Li, L.-H. Lin, J.-S. Lin, Q.-Q. Chen, P. M. Radjenovic, Z.-Q. Tian and J.-F. Li, *Nano Energy*, 2020, **71**, 104554.
- 20 Y. Huang, F. Li, L. Qiu, F. Lin, Z. Lai, S. Wang, L. Lin, Y. Zhu, Y. Wang, Y. Jiang and X. Chen, *ACS Appl. Mater. Interfaces*, 2019, **11**, 26384–26391.
- 21 Z. Zheng, L. Liu, F. Yi and J. Zhao, *J. Lumin.*, 2019, **216**, 116722.
- 22 H. Hu, L. Wu, Y. Tan, Q. Zhong, M. Chen, Y. Qiu, D. Yang, B. Sun, Q. Zhang and Y. Yin, *J. Am. Chem. Soc.*, 2018, **140**, 406–412.
- 23 H. Liu, Y. Tan, M. Cao, H. Hu, L. Wu, X. Yu, L. Wang, B. Sun and Q. Zhang, *ACS Nano*, 2019, **13**, 5366–5374.
- 24 M. He, Y. Cheng, L. Shen, C. Shen, H. Zhang, W. Xiang and X. Liang, *Appl. Surf. Sci.*, 2018, **448**, 400–406.
- 25 F. Gao, W. Yang, X. Liu, Y. Li, W. Liu, H. Xu and Y. Liu, *Chem. Eng. J.*, 2021, **407**, 128001.
- 26 J. Jiang, G. Shao, Z. Zhang, L. Ding, H. Zhang, J. Liu, Z. Chen, W. Xiang and X. Liang, *Chem. Commun.*, 2018, **54**, 12302–12305.
- 27 C. Shen, Y. Zhao, L. Yuan, L. Ding, Y. Chen, H. Yang, S. Liu, J. Nie, W. Xiang and X. Liang, *Chem. Eng. J.*, 2020, **382**, 122868.
- 28 S. Yuan, D. Chen, X. Li, J. Zhong and X. Xu, *ACS Appl. Mater. Interfaces*, 2018, **10**, 18918–18926.
- 29 J. Hou, P. Chen, A. Shukla, A. Krajnc, T. Wang, X. Li, R. Doasa, L. H. G. Tizei, B. Chan, D. N. Johnstone, R. Lin, T. U. Schüllli, I. Martens, D. Appadoo, M. S. Ari, Z. Wang, T. Wei, S. Lo, M. Lu, S. Li, E. B. Namdas, G. Mali, A. K. Cheetham, S. M. Collins, V. Chen, L. Wang and T. D. Bennett, *Science*, 2021, **374**, 621–625.
- 30 Y. Liu, F. Li, Q. Liu and Z. Xia, *Chem. Mater.*, 2018, **30**, 6922–6929.
- 31 K.-K. Liu, Q. Liu, D.-W. Yang, Y.-C. Liang, L.-Z. Sui, J.-Y. Wei, G.-W. Xue, W.-B. Zhao, X.-Y. Wu, L. Dong and C.-X. Shan, *Light Sci. Appl.*, 2020, **9**, 44.
- 32 M. Chen, X. Zhang, C. Luo, R. Qi, H. Peng and H. Lin, *ACS Appl. Mater. Interfaces*, 2021, **13**, 20622–20632.
- 33 Y. Tang, P. Wang, R. Wang, H. Yuan, Y. Xin, X. Ren, Q. Chen and H. Yin, *J. Mater. Chem. C*, 2022, **10**, 616–625.
- 34 K. Du, L. He, S. Song, J. Feng, Y. Li, M. Zhang, H. Li, C. Li and H. Zhang, *Adv. Funct. Mater.*, 2021, **31**, 2103275.
- 35 H. Dong, S. Kareem, X. Gong, J. Ruan, P. Gao, X. Zhou, X. Liu, X. Zhao and Y. Xie, *ACS Appl. Mater. Interfaces*, 2021, **13**, 23960–23969.
- 36 W. Bi, Z. Wang, H. Li, Y. Song, X. Liu, Y. Wang, C. Ge, A. Wang, Y. Kang, Y. Yang, B. Li and Q. Dong, *J. Phys. Chem. Lett.*, 2022, **13**, 6792–6799.
- 37 T. Sheikh, S. Maqbool, P. Mandal and A. Nag, *Angew. Chem. Int. Ed.*, 2021, **60**, 18265–18271.
- 38 L. Gomez, C. de Weerd, J. L. Hueso and T. Gregorkiewicz, *Nanoscale*, 2017, **9**, 631–636.
- 39 C. Carrillo-Carrión, P. del Pino and B. Pelaz, *Appl. Mater. Today*, 2019, **15**, 562–569.
- 40 V. A. Hintermayr, C. Lampe, M. Löw, J. Roemer, W. Vanderlinden, M. Gramlich, A. X. Böhm, C. Sattler, B. Nickel, T. Lohmüller and A. S. Urban, *Nano Lett.*, 2019, **19**, 4928–4933.
- 41 S. N. Raja, Y. Bekenstein, M. A. Koc, S. Fischer, D. Zhang, L. Lin, R. O. Ritchie, P. Yang and A. P. Alivisatos, *ACS Appl. Mater.*

*Interfaces*, 2016, **8**, 35523–35533.

- 42 A. Loiudice, S. Saris, E. Oveisi, D. T. L. Alexander and R. Buonsanti, *Angew. Chem. Int. Ed.*, 2017, **56**, 10696–10701.
- 43 Z. Tan, Y. Chu, J. Chen, J. Li, G. Ji, G. Niu, L. Gao, Z. Xiao and J. Tang, *Adv. Mater.*, 2020, **32**, 2002443.
- 44 Q. Zhong, M. Cao, H. Hu, D. Yang, M. Chen, P. Li, L. Wu and Q. Zhang, *ACS Nano*, 2018, **12**, 8579–8587.
- 45 J. Y. Kim, K. I. Shim, J. W. Han, J. Joo, N. H. Heo and K. Seff, *Adv. Mater.*, 2020, **32**, 2001868.
- 46 P. Song, B. Qiao, D. Song, J. Cao, Z. Shen, G. Zhang, Z. Xu, S. Zhao, S. Wageh and A. Al-Ghamdi, *J. Mater. Sci.*, 2020, **55**, 9739–9747.
- 47 B. Qiao, P. Song, J. Cao, S. Zhao, Z. Shen, Di Gao, Z. Liang, Z. Xu, D. Song and X. Xu, *Nanotechnology*, 2017, **28**, 445602.
- 48 J. Deng, J. Xun, W. Shen, M. Li and R. He, *Mater. Res. Bull.*, 2021, **140**, 111296.
- 49 L. Wu, H. Hu, Y. Xu, S. Jiang, M. Chen, Q. Zhong, D. Yang, Q. Liu, Y. Zhao, B. Sun, Q. Zhang and Y. Yin, *Nano Lett.*, 2017, **17**, 5799–5804.
- 50 M. Xie, H. Liu, F. Chun, W. Deng, C. Luo, Z. Zhu, M. Yang, Y. Li, W. Li, W. Yan and W. Yang, *Small*, 2019, **15**, 1901994.
- 51 A. Jana and K. S. Kim, *ACS Energy Lett.*, 2018, **3**, 2120–2126.
- 52 S. Lou, S. Si, L. Huang, W. Gan, B. Lan, J. Zhang, M. Li, T. Xuan and J. Wang, *Chem. Eng. J.*, 2022, **430**, 132680.
- 53 Z. Zhuang, C. Peng, G. Zhang, H. Yang, J. Yin and H. Fei, *Angew. Chem. Int. Ed.*, 2017, **56**, 14411–14416.
- 54 H. Peng, X. Wang, Y. Tian, T. Dong, Y. Xiao, T. Huang, Y. Guo, J. Wang and B. Zou, *J. Phys. Chem. Lett.*, 2021, **12**, 6639–6647.
- 55 Q. Ba, A. Jana, L. Wang and K. S. Kim, *Adv. Funct. Mater.*, 2019, **29**, 1904768.
- 56 S.-K. Yu, Z.-R. Zhang, Z.-H. Ren, H.-L. Zhai, Q.-Y. Zhu and J. Dai, *Inorg. Chem.*, 2021, **60**, 9132–9140.
- 57 C. Xue, Z.-Y. Yao, J. Zhang, W.-L. Liu, J.-L. Liu and X.-M. Ren, *Chem. Commun.*, 2018, **54**, 4321–4324.
- 58 I. Spanopoulos, I. Hadar, W. Ke, P. Guo, S. Sidhik, M. Kepenekian, J. Even, A. D. Mohite, R. D. Schaller and M. G. Kanatzidis, *J. Am. Chem. Soc.*, 2020, **142**, 9028–9038.
- 59 R. Babu, S. Bhandary, D. Chopra and S. P. Singh, *Chem. Eur. J.*, 2020, **26**, 10519–10527.
- 60 Y. Mu, W. Zhang, X. Guo, G. Dong, M. Zhang and T. Lu, *ChemSusChem*, 2019, **12**, 4769–4774.
- 61 S. Mollick, T. N. Mandal, A. Jana, S. Fajal, A. V. Desai and S. K. Ghosh, *ACS Appl. Nano Mater.*, 2019, **2**, 1333–1340.
- 62 Z. Xia, B. Shi, W. Zhu, Y. Xiao and C. Lü, *Adv. Funct. Mater.*, 2022, **32**, 2207655.
- 63 J. Zhu, Y. Zhu, J. Huang, L. Hou, J. Shen and C. Li, *Nanoscale*, 2020, **12**, 11842–11846.
- 64 H. Zhao, K. Chordiya, P. Leukkunen, A. Popov, M. Upadhyay Kahaly, K. Kordas and S. Ojala, *Nano Res.*, 2021, **14**, 1116–1125.
- 65 H. Wang, H. Zhang, J. Wang, Y. Gao, F. Fan, K. Wu, X. Zong and C. Li, *Angew. Chem. Int. Ed.*, 2021, **60**, 7376–7381.
- 66 M. Aamir, Z. H. Shah, M. Sher, A. Iqbal, N. Revaprasadu, M. A. Malik and J. Akhtar, *Mater. Sci. Semicond. Process.*, 2017, **63**, 6–11.
- 67 D. Ju, X. Zheng, J. Liu, Y. Chen, J. Zhang, B. Cao, H. Xiao, O. F. Mohammed, O. M. Bakr and X. Tao, *Angew. Chem. Int. Ed.*, 2018, **57**, 14868–14872.
- 68 Z. Hong, W. K. Chong, A. Y. R. Ng, M. Li, R. Ganguly, T. C. Sum and H. Sen Soo, *Angew. Chem. Int. Ed.*, 2019, **58**, 3456–3460.
- 69 D. Ju, G. Lin, H. Xiao, Y. Zhang, S. Su and J. Liu, *Sol. RRL*, 2020, **4**, 2000559.
- 70 L. Romani, A. Bala, V. Kumar, A. Speltini, A. Milella, F. Fracassi, A. Listorti, A. Profumo and L. Malavasi, *J. Mater. Chem. C*,

- 2020, **8**, 9189–9194.
- 71 X. Song, G. Wei, J. Sun, C. Peng, J. Yin, X. Zhang, Y. Jiang and H. Fei, *Nat. Catal.*, 2020, **3**, 1027–1033.
- 72 G.-N. Liu, R.-Y. Zhao, B. Xu, Y. Sun, X.-M. Jiang, X. Hu and C. Li, *ACS Appl. Mater. Interfaces*, 2020, **12**, 54694–54702.
- 73 F. Wu, R. Pathak, J. Liu, R. Jian, T. Zhang and Q. Qiao, *ACS Appl. Mater. Interfaces*, 2021, **13**, 44274–44283.
- 74 L. Romani, A. Speltini, F. Ambrosio, E. Mosconi, A. Profumo, M. Marelli, S. Margadonna, A. Milella, F. Fracassi, A. Listorti, F. De Angelis and L. Malavasi, *Angew. Chem. Int. Ed.*, 2021, **60**, 3611–3618.
- 75 D. Laishram, S. Zeng, K. M. Alam, A. P. Kalra, K. Cui, P. Kumar, R. K. Sharma and K. Shankar, *Appl. Surf. Sci.*, 2022, **592**, 153276.
- 76 A. Pisanu, A. Speltini, P. Quadrelli, G. Drera, L. Sangaletti and L. Malavasi, *J. Mater. Chem. C*, 2019, **7**, 7020–7026.
- 77 L. Romani, A. Speltini, C. N. Dibenedetto, A. Listorti, F. Ambrosio, E. Mosconi, A. Simbula, M. Saba, A. Profumo, P. Quadrelli, F. De Angelis and L. Malavasi, *Adv. Funct. Mater.*, 2021, **31**, 2104428.
- 78 H. Yin, J. Chen, P. Guan, D. Zheng, Q. Kong, S. Yang, P. Zhou, B. Yang, T. Pullerits and K. Han, *Angew. Chem. Int. Ed.*, 2021, **60**, 22693–22699.
- 79 R. Chen, G. Gao and J. Luo, *Nano Res.*, 2022, 1–6.
- 80 Z. Li, Q. Hu, Z. Tan, Y. Yang, M. Leng, X. Liu, C. Ge, G. Niu and J. Tang, *ACS Appl. Mater. Interfaces*, 2018, **10**, 43915–43922.
- 81 H. C. Yoon, H. Kang, S. Lee, J. H. Oh, H. Yang and Y. R. Do, *ACS Appl. Mater. Interfaces*, 2016, **8**, 18189–18200.
- 82 H. Zhang, X. Wang, Q. Liao, Z. Xu, H. Li, L. Zheng and H. Fu, *Adv. Funct. Mater.*, 2017, **27**, 1604382.
- 83 A. Pramanik, K. Gates, S. Patibandla, D. Davis, S. Begum, R. Iftekhara, S. Alamgir, S. Paige, M. M. Porter and P. C. Ray, *ACS Appl. Bio Mater.*, 2019, **2**, 5872–5879.
- 84 K. K. Chan, D. Giovanni, H. He, T. C. Sum and K.-T. Yong, *ACS Appl. Nano Mater.*, 2021, **4**, 9022–9033.
- 85 P. M. Talianov, O. O. Peltek, M. Masharin, S. Khubezhov, M. A. Baranov, A. Drabavičius, A. S. Timin, L. E. Zelenkov, A. P. Pushkarev, S. V. Makarov and M. V. Zyuzin, *J. Phys. Chem. Lett.*, 2021, **12**, 8991–8998.
- 86 H. Wu, Y. Chen, W. Zhang, M. S. Khan and Y. Chi, *ACS Appl. Nano Mater.*, 2021, **4**, 11791–11800.
- 87 A. Pramanik, S. Patibandla, Y. Gao, K. Gates and P. C. Ray, *JACS Au*, 2021, **1**, 53–65.
- 88 A. Jana and K. S. Kim, *ACS Appl. Energy Mater.*, 2019, **2**, 4496–4503.
- 89 G.-Y. Qiao, D. Guan, S. Yuan, H. Rao, X. Chen, J.-A. Wang, J.-S. Qin, J.-J. Xu and J. Yu, *J. Am. Chem. Soc.*, 2021, **143**, 14253–14260.
- 90 S. Sasmal, S. Valiyaveetil, A. P. Upadhyay, R. G. S. Pala, S. Sivakumar, C. S. Sundar and D. Sornadurai, *MRS Commun.*, 2018, **8**, 289–296.
- 91 D. Ju, G. Lin, M. Zhou, Y. Hua, X. Li, H. Li and J. Liu, *J. Mater. Chem. A*, 2022, **10**, 17752–17759.
- 92 M. Hamdan and A. K. Chandiran, *Angew. Chem. Int. Ed.*, 2020, **59**, 16033–16038.
- 93 Z. Zhang, L. Liu, H. Huang, L. Li, Y. Wang, J. Xu and J. Xu, *Appl. Surf. Sci.*, 2020, **526**, 146735.
- 94 Z. Zhang, L. Li, L. Liu, X. Xiao, H. Huang and J. Xu, *J. Phys. Chem. C*, 2020, **124**, 22228–22234.
- 95 Z. Li, E. Hofman, J. Li, A. H. Davis, C.-H. Tung, L.-Z. Wu and W. Zheng, *Adv. Funct. Mater.*, 2018, **28**, 1704288.
- 96 K. Chen, K. Qi, T. Zhou, T. Yang, Y. Zhang, Z. Guo, C.-K. Lim, J. Zhang, I. Žutić, H. Zhang and P. N. Prasad, *Nano-Micro Lett.*, 2021, **13**, 172.
- 97 C. G. Sanjayan, M. S. Jyothi, M. Sakar and R. G. Balakrishna, *J. Colloid Interface Sci.*, 2021, **603**, 758–770.

- 98 Z. Lu, Y. Li, Y. Xue, W. Zhou, S. Bayer, I. D. Williams, A. L. Rogach and S. Nagl, *ACS Appl. Nano Mater.*, 2022, **5**, 5025–5034.
- 99 Y. Shu, Y. Wang, J. Guan, Z. Ji, Q. Xu and X. Hu, *Anal. Chem.*, 2022, **94**, 5415–5424.
- 100 D. Zhang, Y. Xu, Q. Liu and Z. Xia, *Inorg. Chem.*, 2018, **57**, 4613–4619.
- 101 S. Ahmed, S. Lahkar, S. Doley, D. Mohanta and S. Kumar Dolui, *J. Photochem. Photobiol. A Chem.*, 2023, **443**, 114821.
- 102 L. Jia, Z. Xu, L. Zhang, Y. Li, T. Zhao and J. Xu, *Appl. Surf. Sci.*, 2022, **592**, 153170.
- 103 X. Yang, L.-F. Ma and D. Yan, *Chem. Sci.*, 2019, **10**, 4567–4572.
- 104 H. Wang, Z. Zhang, J. V. Milić, L. Tan, Z. Wang, R. Chen, X. Jing, C. Yi, Y. Ding, Y. Li, Y. Zhao, X. Zhang, A. Hagfeldt, M. Grätzel and J. Luo, *Adv. Energy Mater.*, 2021, **11**, 2101082.
- 105 J. Xi, Y. Wu, W. Chen, Q. Li, J. Li, Y. Shen, H. Chen, G. Xu, H. Yang, Z. Chen, N. Li, J. Zhu, Y. Li and Y. Li, *Nano Energy*, 2022, **93**, 106846.
- 106 X. Li, X. Zhong, Y. Hu, B. Li, Y. Sheng, Y. Zhang, C. Weng, M. Feng, H. Han and J. Wang, *J. Phys. Chem. Lett.*, 2017, **8**, 1804–1809.
- 107 K. Ahmad and S. M. Mobin, *Energy Technol.*, 2020, **8**, 1901185.
- 108 Q. Jiang, D. Rebollar, J. Gong, E. L. Piacentino, C. Zheng and T. Xu, *Angew. Chem. Int. Ed.*, 2015, **54**, 7617–7620.
- 109 Y. Zhang, L. Han, B. Li and Y. Xu, *Chem. Eng. J.*, 2022, **437**, 135290.
- 110 H. Yu, X. Xu, H. Liu, Y. Wan, X. Cheng, J. Chen, Y. Ye and L. Dai, *ACS Nano*, 2020, **14**, 552–558.
- 111 S. Li, D. Lei, W. Ren, X. Guo, S. Wu, Y. Zhu, A. L. Rogach, M. Chhowalla and A. K. Y. Jen, *Nat. Commun.*, 2020, **11**, 1192.
